# Supplementary material
Source: PubMed Central journal article supplement (PMC3101066)
Supplement: supp_kwr002_kwr002_Web_Table.pdf [file supp_kwr002_kwr002_Web_Table.pdf]

Web Table 1. SNPs under study in the cell cycle control genes, the Shanghai Endometrial Cancer Study, China, 1997-2003.

| No. | Genes        | SNP        | Alleles <sup>a</sup> | Role       | Position <sup>b</sup> | Chromosome | MAF <sup>c</sup> | Genotype frequency <sup>d</sup> |       |       | P value <sup>e</sup> | Het OR 95% CI <sup>f</sup> |           | Hom OR 95% CI <sup>g</sup> |           | P trend |
|-----|--------------|------------|----------------------|------------|-----------------------|------------|------------------|---------------------------------|-------|-------|----------------------|----------------------------|-----------|----------------------------|-----------|---------|
|     |              |            |                      |            |                       |            |                  | AA                              | AB    | BB    |                      | OR                         | 95% CI    | OR                         | 95% CI    |         |
| 1   | <i>CCNB1</i> | rs352626   | T/C                  | Promoter   | 68497959              | Chr5       | 47.64            | 28.16                           | 48.40 | 23.44 | 0.107                | 1.10                       | 0.89,1.37 | 1.01                       | 0.78,1.30 | 0.922   |
| 2   |              | rs350104   | C/T                  | Promoter   | 68498194              | Chr5       | 31.60            | 46.47                           | 43.86 | 9.67  | 0.503                | 1.21                       | 1.00,1.47 | 1.19                       | 0.86,1.64 | 0.074   |
| 3   |              | rs2069433  | C/T                  | Intron     | 68503263              | Chr5       | 7.28             | 85.89                           | 13.67 | 0.44  | 1.000                | 0.79                       | 0.60,1.02 | 0.35                       | 0.08,1.46 | 0.030   |
| 4   | <i>CCND1</i> | rs649392   | G/A                  | Intron     | 69173974              | Chr11      | 11.23            | 76.39                           | 22.13 | 1.48  | <0.001               | 0.96                       | 0.77,1.20 | 0.75                       | 0.35,1.60 | 0.518   |
| 5   | <i>CCNE1</i> | rs3218055  | G/A                  | Intron     | 35002719              | Chr19      | 14.38            | 73.36                           | 24.52 | 2.12  | 0.631                | 0.81                       | 0.66,1.00 | 0.91                       | 0.48,1.71 | 0.080   |
| 6   |              | rs1406     | T/G                  | 3'UTR      | 35006952              | Chr19      | 32.67            | 45.38                           | 43.90 | 10.72 | 0.481                | 1.04                       | 0.86,1.26 | 0.83                       | 0.61,1.14 | 0.510   |
| 7   | <i>CDK2</i>  | rs2069415  | A/G                  | 3'UTR      | 54652246              | Chr12      | 14.53            | 72.76                           | 25.42 | 1.82  | 0.632                | 0.90                       | 0.73,1.11 | 0.86                       | 0.44,1.70 | 0.297   |
| 8   |              | rs773107   | G/A                  | 3'flanking | 54655773              | Chr12      | 7.46             | 85.47                           | 14.14 | 0.39  | 0.083                | 1.06                       | 0.82,1.38 | 6.09                       | 0.73,51.0 | 0.306   |
| 9   |              | rs773108   | G/A                  | 3'flanking | 54656178              | Chr12      | 24.14            | 57.83                           | 36.06 | 6.11  | 1.000                | 0.91                       | 0.75,1.10 | 0.97                       | 0.66,1.43 | 0.469   |
| 10  | <i>CDK4</i>  | rs2069502  | G/A                  | Intron     | 56430932              | Chr12      | 36.37            | 40.29                           | 46.70 | 13.02 | 0.451                | 0.99                       | 0.81,1.20 | 1.05                       | 0.79,1.40 | 0.836   |
| 11  |              | rs2270777  | A/G                  | Intron     | 56431423              | Chr12      | 15.37            | 71.58                           | 26.11 | 2.32  | 0.810                | 1.00                       | 0.81,1.23 | 0.82                       | 0.44,1.52 | 0.762   |
| 12  |              | rs2072052  | A/C                  | Promoter   | 56432986              | Chr12      | 36.58            | 39.96                           | 46.92 | 13.12 | 0.332                | 0.99                       | 0.81,1.20 | 1.07                       | 0.80,1.43 | 0.760   |
| 13  | <i>CDK6</i>  | rs4272     | G/A                  | 3'UTR      | 91881480              | Chr7       | 10.77            | 79.40                           | 19.66 | 0.94  | 0.533                | 0.82                       | 0.65,1.04 | 0.70                       | 0.27,1.83 | 0.074   |
| 14  |              | rs42031    | T/A                  | 3'UTR      | 91882047              | Chr7       | 5.65             | 89.05                           | 10.60 | 0.35  | 0.569                | 0.87                       | 0.65,1.16 | 1.61                       | 0.28,9.18 | 0.458   |
| 15  |              | rs42041    | G/C                  | Intron     | 91891395              | Chr7       | 2.22             | 95.57                           | 4.43  | 0.00  | 1.000                | 0.95                       | 0.61,1.50 | -                          | -         | -       |
| 16  |              | rs2040494  | C/T                  | Intron     | 91901556              | Chr7       | 20.18            | 63.39                           | 32.86 | 3.75  | 0.090                | 0.96                       | 0.79,1.16 | 1.46                       | 0.89,2.39 | 0.598   |
| 17  |              | rs2237570  | T/A                  | Intron     | 91902905              | Chr7       | 8.65             | 83.47                           | 15.76 | 0.77  | 0.842                | 1.04                       | 0.81,1.34 | 0.90                       | 0.30,2.67 | 0.847   |
| 18  |              | rs2237572  | T/C                  | Intron     | 91904911              | Chr7       | 21.29            | 64.11                           | 29.20 | 6.69  | 0.003                | 1.01                       | 0.82,1.23 | 1.28                       | 0.88,1.86 | 0.346   |
| 19  |              | rs2282978  | C/T                  | Intron     | 91909061              | Chr7       | 11.30            | 78.73                           | 19.94 | 1.33  | 1.000                | 0.79                       | 0.63,0.99 | 0.75                       | 0.34,1.68 | 0.040   |
| 20  |              | rs2282979  | C/T                  | Intron     | 91909644              | Chr7       | 10.81            | 79.57                           | 19.25 | 1.18  | 0.887                | 0.80                       | 0.64,1.01 | 0.67                       | 0.28,1.57 | 0.042   |
| 21  |              | rs10225965 | C/T                  | Intron     | 91918229              | Chr7       | 29.69            | 49.33                           | 41.94 | 8.72  | 0.597                | 0.92                       | 0.76,1.12 | 0.95                       | 0.68,1.32 | 0.498   |
| 22  |              | rs2282981  | T/C                  | Intron     | 91921377              | Chr7       | 16.31            | 69.64                           | 28.09 | 2.27  | 0.032                | 0.87                       | 0.71,1.07 | 1.48                       | 0.79,2.77 | 0.635   |
| 23  |              | rs2282983  | C/T                  | Intron     | 91924014              | Chr7       | 27.33            | 52.39                           | 40.57 | 7.04  | 0.223                | 0.85                       | 0.70,1.02 | 0.83                       | 0.58,1.20 | 0.088   |

|    |               |            |     |            |          |       |       |       |       |       |       |      |           |      |           |       |
|----|---------------|------------|-----|------------|----------|-------|-------|-------|-------|-------|-------|------|-----------|------|-----------|-------|
| 24 |               | rs11773884 | G/A | Intron     | 91929774 | Chr7  | 15.94 | 70.33 | 27.45 | 2.22  | 0.196 | 0.95 | 0.78,1.17 | 1.24 | 0.66,2.32 | 0.974 |
| 25 |               | rs2282985  | C/G | Intron     | 91940068 | Chr7  | 49.60 | 25.26 | 50.27 | 24.47 | 0.314 | 0.87 | 0.70,1.09 | 0.94 | 0.72,1.21 | 0.615 |
| 26 |               | rs2282986  | C/T | Intron     | 91944196 | Chr7  | 33.56 | 43.52 | 45.84 | 10.65 | 0.620 | 1.10 | 0.91,1.33 | 1.06 | 0.76,1.44 | 0.474 |
| 27 |               | rs2301556  | A/G | Intron     | 91945238 | Chr7  | 14.41 | 72.96 | 25.26 | 1.78  | 0.123 | 0.93 | 0.76,1.15 | 1.48 | 0.73,2.98 | 0.992 |
| 28 |               | rs7781436  | C/T | Intron     | 91962403 | Chr7  | 3.71  | 92.72 | 7.13  | 0.15  | 0.620 | 1.24 | 0.87,1.76 | -    | -         | -     |
| 29 |               | rs11981129 | T/C | Intron     | 91968701 | Chr7  | 48.18 | 26.85 | 49.95 | 23.20 | 0.448 | 0.95 | 0.77,1.18 | 1.10 | 0.85,1.42 | 0.514 |
| 30 |               | rs3802079  | A/G | Intron     | 91975131 | Chr7  | 33.30 | 44.33 | 44.73 | 10.94 | 0.888 | 1.02 | 0.84,1.24 | 1.03 | 0.76,1.40 | 0.815 |
| 31 |               | rs2079147  | G/A | Intron     | 91977026 | Chr7  | 12.62 | 76.33 | 22.09 | 1.58  | 1.484 | 0.88 | 0.71,1.10 | 1.40 | 0.67,2.93 | 0.615 |
| 32 |               | rs10254840 | G/A | Intron     | 91978059 | Chr7  | 47.78 | 27.83 | 48.77 | 23.40 | 0.797 | 0.97 | 0.78,1.21 | 1.09 | 0.85,1.41 | 0.536 |
| 33 |               | rs2282991  | T/A | Intron     | 91989732 | Chr7  | 7.17  | 86.16 | 13.35 | 0.49  | 1.000 | 0.87 | 0.66,1.13 | 0.69 | 0.19,2.55 | 0.243 |
| 34 |               | rs10228493 | C/T | Intron     | 92005048 | Chr7  | 15.01 | 72.01 | 25.97 | 2.02  | 0.516 | 1.05 | 0.85,1.29 | 1.15 | 0.60,2.20 | 0.564 |
| 35 |               | rs17164769 | C/T | Intron     | 92018032 | Chr7  | 15.75 | 71.12 | 26.27 | 2.61  | 1.000 | 1.02 | 0.83,1.25 | 1.27 | 0.72,2.25 | 0.559 |
| 36 |               | rs2282993  | G/A | Intron     | 92036132 | Chr7  | 15.83 | 71.05 | 26.24 | 2.71  | 1.000 | 0.99 | 0.80,1.21 | 1.25 | 0.71,2.20 | 0.747 |
| 37 |               | rs3802074  | G/A | Intron     | 92041142 | Chr7  | 6.11  | 88.12 | 11.54 | 0.35  | 0.169 | 0.88 | 0.66,1.17 | -    | -         | -     |
| 38 |               | rs3731303  | A/G | Intron     | 92048510 | Chr7  | 15.35 | 72.40 | 24.49 | 3.10  | 0.467 | 0.95 | 0.77,1.17 | 1.29 | 0.76,2.20 | 0.853 |
| 39 |               | rs445      | T/C | Intron     | 92053021 | Chr7  | 34.69 | 42.29 | 46.04 | 11.67 | 0.209 | 1.00 | 0.82,1.21 | 1.22 | 0.90,1.65 | 0.326 |
| 40 |               | rs1005346  | G/A | Intron     | 92068156 | Chr7  | 12.39 | 76.90 | 21.43 | 1.67  | 0.772 | 0.87 | 0.70,1.09 | 1.11 | 0.54,2.26 | 0.364 |
| 41 |               | rs17164786 | C/T | Intron     | 92077947 | Chr7  | 5.89  | 88.77 | 10.67 | 0.55  | 0.562 | 0.87 | 0.65,1.18 | 1.55 | 0.43,5.59 | 0.604 |
| 42 |               | rs10246604 | A/C | Intron     | 92093944 | Chr7  | 7.91  | 85.17 | 13.84 | 0.99  | 0.659 | 0.91 | 0.70,1.18 | 1.58 | 0.61,4.13 | 0.847 |
| 43 |               | rs3731268  | A/G | Intron     | 92104894 | Chr7  | 6.04  | 88.41 | 11.09 | 0.49  | 1.000 | 0.85 | 0.64,1.13 | 1.87 | 0.47,7.52 | 0.508 |
| 44 |               | rs929244   | A/G | Promoter   | 92110956 | Chr7  | 9.13  | 82.88 | 15.98 | 1.14  | 1.000 | 0.90 | 0.70,1.16 | 1.49 | 0.61,3.66 | 0.775 |
| 45 | <i>CDKN1A</i> | rs3829963  | A/C | Promoter   | 36752362 | Chr6  | 42.08 | 34.49 | 46.86 | 18.65 | 0.027 | 1.01 | 0.82,1.24 | 0.79 | 0.61,1.03 | 0.129 |
| 46 |               | rs3176343  | A/G | Intron     | 36758245 | Chr6  | 31.16 | 48.02 | 41.63 | 10.35 | 0.092 | 1.06 | 0.87,1.28 | 0.89 | 0.65,1.22 | 0.797 |
| 47 |               | rs12207548 | C/T | 3'flanking | 36764234 | Chr6  | 41.92 | 34.09 | 47.98 | 17.93 | 0.117 | 1.25 | 1.02,1.53 | 1.10 | 0.85,1.44 | 0.249 |
| 48 |               | rs12528248 | A/G | 3'flanking | 36764360 | Chr6  | 45.32 | 30.89 | 47.59 | 21.53 | 0.018 | 1.09 | 0.89,1.35 | 0.83 | 0.65,1.07 | 0.237 |
| 49 |               | rs12191972 | C/T | 3'flanking | 36766720 | Chr6  | 12.81 | 76.20 | 21.98 | 1.82  | 0.020 | 1.17 | 0.94,1.45 | 0.52 | 0.26,1.05 | 0.839 |
| 50 | <i>CDKN1B</i> | rs12229100 | T/C | Promoter   | 12757103 | Chr12 | 32.57 | 44.77 | 45.32 | 9.91  | 0.240 | 0.98 | 0.81,1.18 | 1.01 | 0.73,1.38 | 0.930 |

|    |               |            |            |            |          |       |       |       |       |       |       |           |           |           |           |       |
|----|---------------|------------|------------|------------|----------|-------|-------|-------|-------|-------|-------|-----------|-----------|-----------|-----------|-------|
| 51 | rs11055027    | <b>C/G</b> | Promoter   | 12758748   | Chr12    | 18.24 | 66.83 | 29.86 | 3.31  | 0.731 | 1.21  | 0.99,1.48 | 1.89      | 1.12,3.19 | 0.006     |       |
| 52 | rs3759216     | <b>A/G</b> | Promoter   | 12759353   | Chr12    | 43.66 | 31.80 | 49.06 | 19.13 | 0.376 | 0.76  | 0.62,0.93 | 0.73      | 0.56,0.94 | 0.008     |       |
| 53 | rs3759217     | <b>T/C</b> | Promoter   | 12759719   | Chr12    | 4.15  | 91.91 | 7.89  | 0.20  | 0.649 | 1.13  | 0.80,1.58 | 0.90      | 0.12,6.58 | 0.525     |       |
| 54 | rs34330       | <b>T/C</b> | 5'UTR      | 12761962   | Chr12    | 49.75 | 25.85 | 48.79 | 25.36 | 0.184 | 1.33  | 1.06,1.66 | 1.51      | 1.16,1.94 | 0.002     |       |
| 55 | rs4251697     | <b>A/G</b> | 3'UTR      | 12765729   | Chr12    | 13.37 | 74.98 | 23.30 | 1.72  | 0.780 | 1.06  | 0.85,1.31 | 0.98      | 0.49,1.97 | 0.679     |       |
| 56 | rs7330        | <b>C/A</b> | 3'UTR      | 12766184   | Chr12    | 11.95 | 77.34 | 21.43 | 1.23  | 0.541 | 1.02  | 0.82,1.28 | 1.34      | 0.59,3.06 | 0.633     |       |
| 57 | rs1420023     | <b>G/C</b> | 3'flanking | 12767378   | Chr12    | 12.35 | 76.74 | 21.83 | 1.43  | 0.870 | 1.19  | 0.95,1.48 | 1.67      | 0.77,3.61 | 0.055     |       |
| 58 | rs34322       | <b>C/T</b> | 3'flanking | 12770837   | Chr12    | 48.35 | 27.47 | 48.37 | 24.16 | 0.492 | 0.84  | 0.67,1.04 | 0.73      | 0.57,0.94 | 0.015     |       |
| 59 | <i>CDKN2A</i> | rs3731257  | <b>C/T</b> | 3'flanking | 21956221 | Chr9  | 49.48 | 26.40 | 48.23 | 25.37 | 1.000 | 0.91      | 0.73,1.13 | 1.06      | 0.82,1.37 | 0.654 |
| 60 |               | rs3731239  | <b>C/T</b> | Intron     | 21964218 | Chr9  | 13.58 | 74.96 | 22.92 | 2.12  | 0.590 | 0.91      | 0.73,1.13 | 0.97      | 0.52,1.81 | 0.464 |
| 61 |               | rs4074785  | <b>A/G</b> | Intron     | 21971583 | Chr9  | 12.39 | 77.14 | 20.94 | 1.92  | 0.093 | 1.18      | 0.95,1.48 | 0.99      | 0.50,1.95 | 0.230 |
| 62 |               | rs3731217  | <b>G/T</b> | Intron     | 21974661 | Chr9  | 20.10 | 64.48 | 30.84 | 4.68  | 0.326 | 0.99      | 0.81,1.20 | 1.00      | 0.65,1.55 | 0.930 |
| 63 |               | rs7036656  | <b>C/T</b> | Intron     | 21980457 | Chr9  | 22.37 | 60.73 | 33.79 | 5.48  | 0.723 | 0.97      | 0.80,1.18 | 1.11      | 0.74,1.67 | 0.923 |
| 64 |               | rs3218020  | <b>T/C</b> | Promoter   | 21987872 | Chr9  | 47.49 | 27.99 | 49.04 | 22.97 | 0.842 | 1.01      | 0.81,1.25 | 1.05      | 0.81,1.35 | 0.744 |
| 65 |               | rs2811712  | <b>G/A</b> | Promoter   | 21988035 | Chr9  | 22.19 | 61.03 | 33.55 | 5.42  | 0.858 | 0.89      | 0.74,1.09 | 1.05      | 0.70,1.58 | 0.543 |

a. Minor allele is bolded.

b. Chromosome position based on NCBI build 35.

c. Minor allele frequency for each SNP.

d. For each SNP, AA, major allele homozygote, AB, heterozygote, BB, minor allele homozygote.

e. P value is the probability of the Chi-square test for Hardy-Weinberg disequilibrium among controls.

f. Heterozygous odds ratio (95% confidence interval).

g. Homozygous odds ratio (95% confidence interval).
